# Supplementary material for: Analysis of biofuels production from sugar based on three criteria: Thermodynamics, bioenergetics, and product separation
Source: Royal Society of Chemistry journal article supplement (doi:10.1039/c0ee00069h), 2010-12-16
Supplement: c0ee00069h.pdf [file c0ee00069h.pdf]

**Electronic Supplementary Information**

**Analysis of Biofuels Production from Sugar Based on Three Criteria:  
Thermodynamics, Bioenergetics, and Product Separation**

**Wei-Dong Huang<sup>1,2</sup>, Y.-H. Percival Zhang<sup>1,3,4,\*</sup>**

<sup>1</sup> Biological Systems Engineering Department, Virginia Polytechnic Institute and State University (Virginia Tech), 210-A Seitz Hall, Blacksburg, Virginia 24061, USA

<sup>2</sup> Environmental Division, College of Earth and Space Science, University of Science and Technology of China, Hefei, China 230026

<sup>3</sup> Institute for Critical Technology and Applied Science (ICTAS), Virginia Polytechnic Institute and State University, Blacksburg, Virginia 24061, USA

<sup>4</sup> DOE BioEnergy Science Center (BESC), Oak Ridge, Tennessee 37831, USA

Corresponding author: YPZ, Email: [ypzhang@vt.edu](mailto:ypzhang@vt.edu),

Tel: (540) 231-7414 [O], Fax: (540) 231-3199

**Table S1.** The data used for the calculation in Figure 6.

| Biofuel  | Status      | $\eta$       | $\eta_{P/S}^{The}$ | $A_{X/S}$ | $\eta_S$ | Note                                         |
|----------|-------------|--------------|--------------------|-----------|----------|----------------------------------------------|
| Ethanol  | Theoretical | <b>0.971</b> | 1                  | NA        | NA       |                                              |
|          | Current     | <b>0.721</b> | 0.96               | 0.1       | 0.141    | 12% ethanol                                  |
|          | Future      | <b>0.809</b> | 0.99               | 0.02      | 0.141    | 12% ethanol                                  |
| Butanol  | Theoretical | <b>0.953</b> | 1                  | 0         | 0        |                                              |
|          | Current     | <b>0.451</b> | 0.7                | 0.12      | 0.232    | 2% butanol                                   |
|          | Future      | <b>0.781</b> | 0.95               | 0.02      | 0.12     | 5% butanol                                   |
| FEE      | Theoretical | <b>0.904</b> | 1                  | BA        | NA       |                                              |
|          | Current (i) | <b>0.092</b> | 0.7                | 0.5       | 0.71     | intra lipids (45%) based on algal separation |
|          | Current (s) | <b>0.310</b> | 0.7                | 0.5       | 0.02     | liquid/liquid separation                     |
|          | Future (s)  | <b>0.644</b> | 0.9                | 0.2       | 0.01     | liquid/liquid separation                     |
| Hydrogen | Theoretical | <b>1.220</b> | 1                  | NA        | NA       |                                              |
|          | Current     | <b>1.012</b> | 0.95               | 0.1       | 0.03     | CO <sub>2</sub> /H <sub>2</sub> separation   |
|          | Future      | <b>1.208</b> | 1                  | 0.001     | 0.00845  | No separation for fuel cells                 |
